# Supplementary material
Source: PubMed Central journal article supplement (PMC7791094)
Supplement: NIHMS1608379-supplement-Appendix_1.pdf [file NIHMS1608379-supplement-Appendix_1.pdf]

## Appendix 1.

### COORDINATED CARE ORGANIZATION (CCO) FUNDING SOURCE AND PAYMENT MECHANISM FOR CHW SERVICES

| Funding Source - Payment Mechanism                                | Description of payment mechanism and funding source                                                                                        | Counts toward numerator in MLR <sup>1</sup> ? | Counts towards 'medical' portion of rate-setting <sup>1</sup> ? |
|-------------------------------------------------------------------|--------------------------------------------------------------------------------------------------------------------------------------------|-----------------------------------------------|-----------------------------------------------------------------|
| <b>CCO GLOBAL BUDGET (GB) FUNDING SOURCE</b>                      |                                                                                                                                            |                                               |                                                                 |
| <b>Reporting Category: Administrative Expense</b>                 |                                                                                                                                            |                                               |                                                                 |
| GB Administrative                                                 | Operational costs of the payer that do not meet criteria for medical expenditures, such as benefits management.                            | No                                            | No                                                              |
| <b>Reporting Category: Medical Expense</b>                        |                                                                                                                                            |                                               |                                                                 |
| GB - Fee-for-service (FFS)                                        | Claims-based payment of services from CCO to provider per approved billing codes.                                                          | Yes                                           | Yes                                                             |
| GB - Alternative Payment Model (APM), Per Member Per Month (PMPM) | Providers receive per member per month payments (PMPM) from CCOs.                                                                          | Yes                                           | Yes                                                             |
| <b>Reporting Category: Health-Related Services Expense</b>        |                                                                                                                                            |                                               |                                                                 |
| GB - Flexible Services                                            | Non-covered services that are cost-effective, supplement covered benefits and improve health quality.                                      | Yes <sup>2</sup>                              | No <sup>2</sup>                                                 |
| GB - Community Benefit Initiatives                                | Community level initiatives that improve health quality, not necessarily limited to members.                                               | Yes <sup>2</sup>                              | No <sup>2</sup>                                                 |
| <b>OTHER CCO FUNDING SOURCES</b>                                  |                                                                                                                                            |                                               |                                                                 |
| Grant funding                                                     | Short-term funding for projects to CCOs or provider organizations from different funders (e.g., state, private, CCI) <sup>3</sup>          | N/A                                           | N/A                                                             |
| Quality Incentive Pool/ Funds                                     | CCOs and provider organizations may receive bonus funds for meeting targets for performance, quality or costs <sup>3</sup>                 | N/A                                           | N/A                                                             |
| Hospital-Sponsored Community Benefit                              | Nonprofit hospitals are required to spend some surplus funds to benefit the community, such as for improving access and population health. | N/A                                           | N/A                                                             |

<sup>1</sup> **Medical Loss Ratio (MLR)** is a set minimum percentage of total premium revenues that a payer must expend towards medical expenditures as designated by government rules or contract. If a state chooses to set a minimum MLR for Medicaid managed care organizations (MCO), such as Oregon CCOs, that MLR must be at least 85 percent (42 CFR 438.8). **Rate-setting** is a calculation on capitation rates that a state will pay Medicaid MCOs, typically paid per month per member.

<sup>2</sup> <https://www.oregon.gov/oha/HPA/dsi-tc/Documents/OHA-Health-Related-Services-Brief.pdf>. Health-related services (HRS) spending counts as medical expenditures for the purpose of calculating MLR if it meets the federal definition of activities that improve health care quality or expenditures related to health information technology and meaningful use requirements.

<sup>3</sup> Funds may originate from the state or CCO global budget.
